# Supplementary material for: Nanosized silver phosphate-based asymmetric and symmetric electrochemical capacitors for first- and second-order low-pass filter applications
Source: Royal Society of Chemistry journal article supplement (doi:10.1039/d6na00255b), 2026-06-05
Supplement: d6na00255b1.pdf [file d6na00255b1.pdf]

## Supporting information

Nanosized silver phosphate based asymmetric and symmetric electrochemical capacitors for first and second-order low-pass filter application

**Material Characterization:** X-ray diffraction (XRD) study was performed using a PANalytical X'pert diffractometer to determine the crystal structure. Surface features were examined using a JEOL JSM-7001F scanning electron microscope (SEM) operating at 15 kV. Transmission electron microscopy (TEM) technique (JEOL JEM-ARM200F) provided detailed morphological insights. Surface chemistry was analyzed through X-ray photoelectron spectroscopy (XPS) using a Thermo Scientific MultiLab 2000. Raman spectroscopy, conducted with a Jobin-Yvon T64000 spectrometer, offered information on molecular vibrations. Fourier transform infrared spectroscopy (FTIR) measurements were performed with a Shimadzu IRSpirit-X to identify functional groups.

Figure: S1

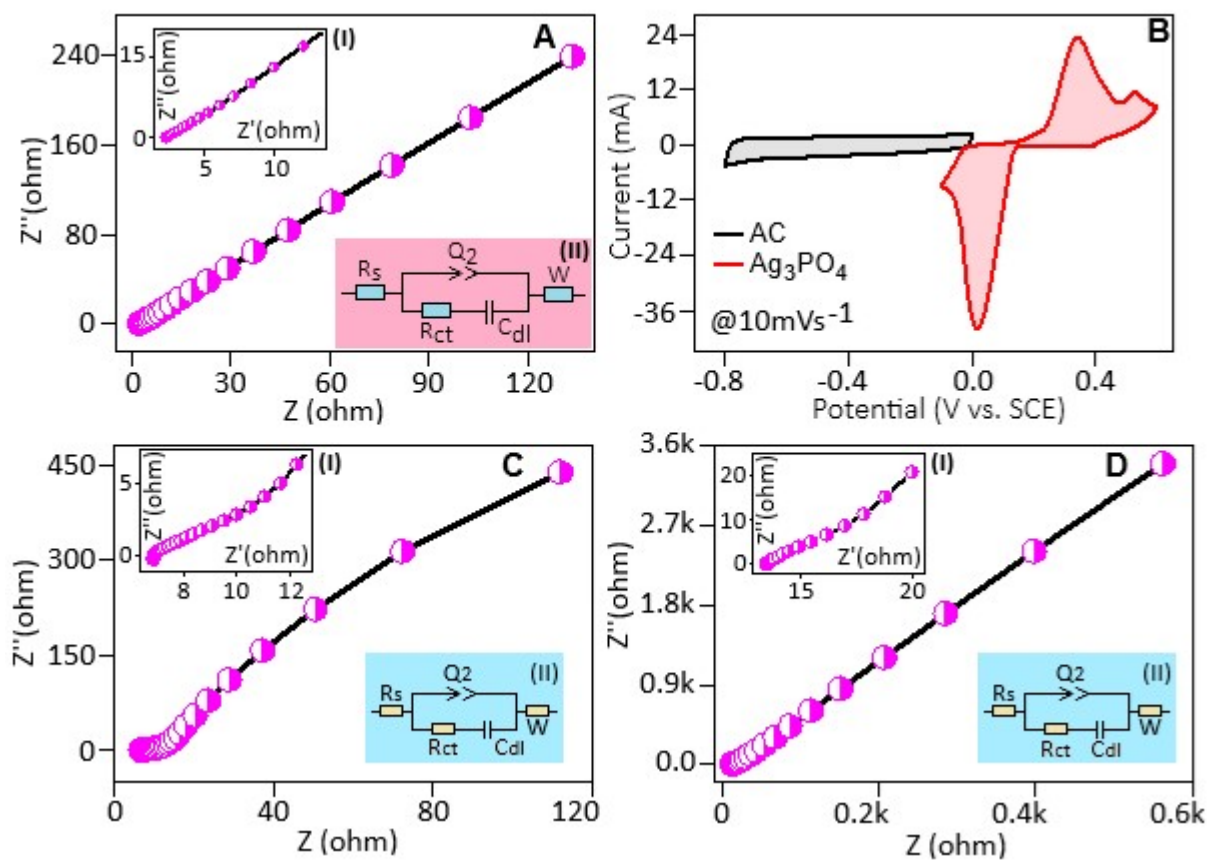

**Figure S1:** (A) Nyquist plot within the frequency ranges from 100 mHz to 200kHz for three electrode system. Inset figures: (I) magnified image of the plot for the high-frequency region and (II) equivalent circuit model. (B) Comparative voltammograms of the activated carbon and SPO modified electrodes at  $10\text{ mV}\cdot\text{s}^{-1}$ . (C) Nyquist plot for the asymmetric device within the frequency ranges from 100mHz to 200kHz. Inset figures: (I) magnified image of the plot for the high-frequency region and (II) equivalent circuit model. (D) Nyquist plot of the symmetric device within the frequency ranges from 100mHz to 200kHz. Inset figures: (I) magnified image of the plot for the high-frequency region and (II) equivalent circuit model.

**Table S1:** Electrochemical performance parameters for various silver-based electrode materials used in electrochemical capacitor applications.

Table: S1

| Electrode material                                              | Electrolyte | Specific capacitance /capacity (Device) | Energy density (Wh/kg) | Power density (kW/kg) | Stability @ cycles | Ref.      |
|-----------------------------------------------------------------|-------------|-----------------------------------------|------------------------|-----------------------|--------------------|-----------|
| Ag-CuO                                                          | KOH (6M)    | 134.98 F/g @1.5A/g                      | 40.02                  | 1.0                   | 96.7% @5000        | [1]       |
| Ag-PASA                                                         | KOH (1M)    | 55 C/g @ 5 mV/s                         | 15.1                   | 0.3                   | 85% @10000         | [2]       |
| Ag <sub>2</sub> S /graphene                                     | KOH (6M)    | 20 F/g @1 A/g                           | 15                     | 1.8                   | 80% @7500          | [3]       |
| Ag-CoS                                                          | KOH (1M)    | 97 C/g @1 A/g                           | 22.3                   | 0.8                   | 82 % @1000         | [4]       |
| Ag <sub>2</sub> Co <sub>3</sub> (PO <sub>6</sub> ) <sub>2</sub> | KOH (1M)    | 178.59 C/g @ 1 A/g                      | 40.92                  | 4.1 @ 5 A/g           | 89.21 @3000        | [5]       |
| β-Ag <sub>2</sub> MoO <sub>4</sub>                              | KOH (2M)    | 392 C/g @ 2 A/g                         | 54                     | 7.5                   | 79.7 @5000         | [6]       |
| Ag <sub>2</sub> CrO <sub>4</sub>                                | KOH (1M)    | 36 C/g @ 0.4 A/g                        | 13.0                   | 0.3                   | 85 % @5000         | [7]       |
| Ag <sub>3</sub> PO <sub>4</sub>                                 | KOH (2M)    | 99 C/g @ 0.5A/g                         | 41                     | 0.86                  | 86% @5000          | This work |

\* Ag-CuO: silver copper oxide; Ag-PASA: silver poly(aminosalicylic acid); Ag-CoS

: silver cobalt-sulfide; Ag<sub>2</sub>S: silver sulfide; Ag<sub>2</sub>Co<sub>3</sub>(PO<sub>6</sub>)<sub>2</sub>: silver cobalt phosphate; β-Ag<sub>2</sub>MoO<sub>4</sub>: silver molybdate; Ag<sub>2</sub>CrO<sub>4</sub>: silver chromate.

References:

- 1 Y. Mao, Y. Qian, L. Li, Y. Li, J. Xie, and W. Hu, *J. Mater. Sci.*, 2020, **55**, 6963-6975.
- 2 P. Kumari, C. Saha, S. K. Ghosh, V. K. Perla, H. Singh, and K. Mallick, *New J. Chem.*, 2024, 49, 234-245.
- 3 I. M. Babu, and I. Rathinamala, *Ionics*, 2023, 29, 4617-4627.
- 4 M. W. Iqbal, M. M. Faisal, H. U. Hassan, A. M. Afzal, S. Aftab, T. Zahid and A. U. Rehman, *J. Energy Storage*, 2022, 52, 104847.
- 5 S.R. Ali, M.M. Faisal, S. Pushpan, N.P. Aguilar, K.K. Singh, A. Cerdán-Pasarán, M.M.A. Rodríguez, E.M. Sánchez, A. T. Castro, S. L. Loredo and K. C. Sanal *Int. J. Energy Res.*, 2022, 46, 23757-23774.
- 6 J. J. William, S. Balakrishnan, M. Murugesan, M. Gopalan, A. J. Britten and M. Mkandawire, *Materials Adv.*, 2022, 3, 8288-8297.
- 7 P. Kumari, M. R. Hazarika, C. Saha, H. Singh, K. Mallick, *Nanoscale Adv.*, 2025, 8, 872-884.
